# Supplementary material
Source: publisher figshare collection journal article supplement (https://acs.figshare.com/ndownloader/files/18039605)
Supplement: Supplementary file 1 [file 18039605]

## Supporting information

### Untargeted and Targeted Discrimination of Honey Collected by *Apis cerana* and *Apis mellifera* Based on Volatiles Using HS-GC-IMS and HS-SPME-GC-MS

Xinran Wang<sup>a</sup>, Karyne M. Rogers<sup>b</sup>, Yi Li<sup>a,c,d,e</sup>, Shupeng Yang<sup>a,c,d,e</sup>, Lanzhen Chen<sup>a,c,d,e\*</sup>, Jinhui Zhou<sup>a,c,d,e\*</sup>

<sup>a</sup> Institute of Apicultural Research, Chinese Academy of Agricultural Sciences, Beijing 100093, PR China

<sup>b</sup> National Isotope Centre, GNS Science, 30 Gracefield Road, Lower Hutt 5040, New Zealand

<sup>c</sup> Laboratory of Risk Assessment for Quality and Safety of Bee Products, Ministry of Agriculture, Beijing 100093, PR China

<sup>d</sup> Key Laboratory of Bee Products for Quality and Safety Control, Ministry of Agriculture, Beijing 100093, PR China

<sup>e</sup> Bee Product Quality Supervision and Testing Centre, Ministry of Agriculture, Beijing 100093, PR China

---

Corresponding author. Tel: 86-10-6259-6429; Fax: 86-10-6259-4643; Email: zhoujinhui@caas.cn (Jinhui Zhou) and Lanzhen Chen (chenlanzhen2005@126.com). These authors contributed equally to this work.

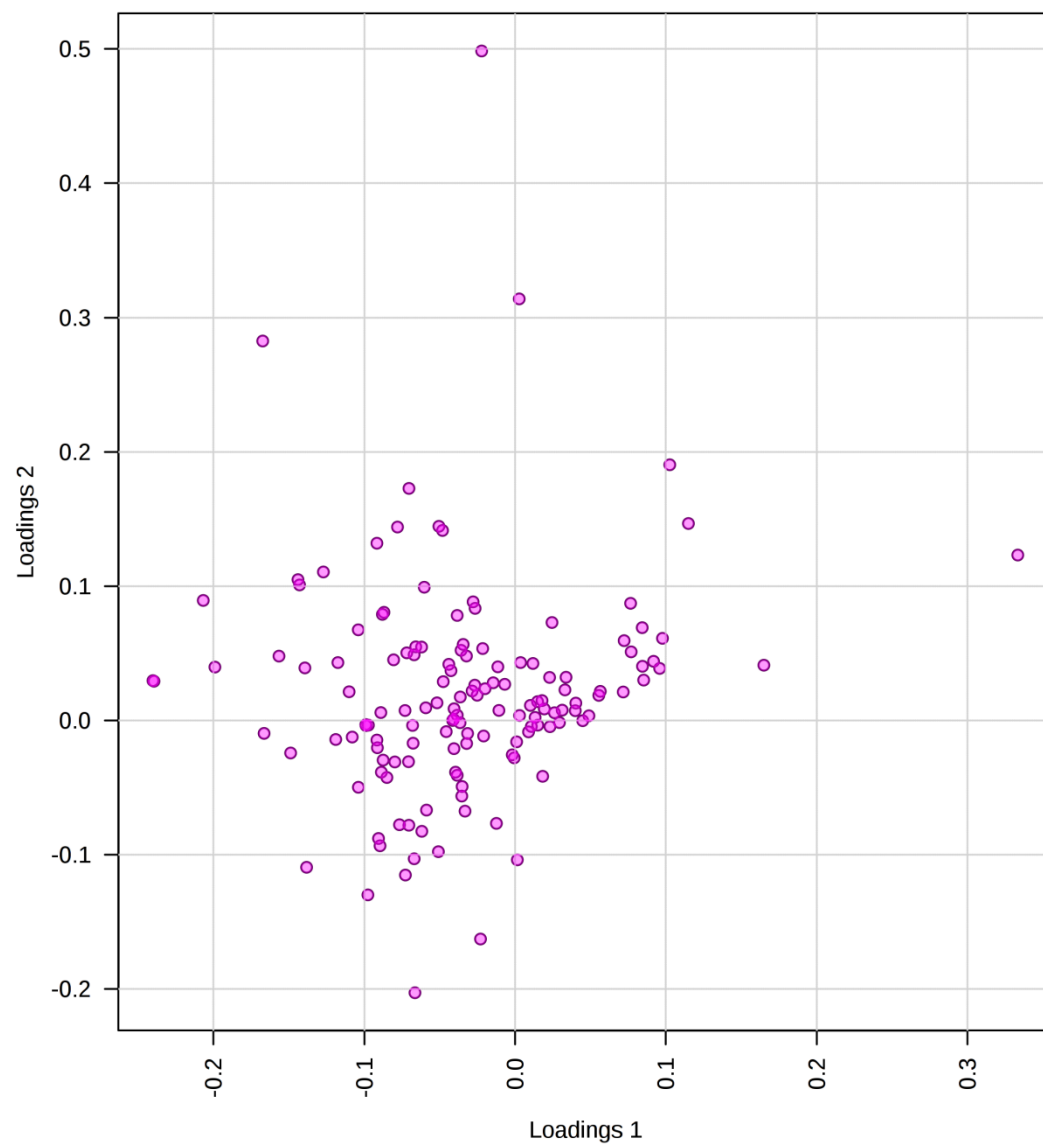

Figure S1 The loading plot of PCA model

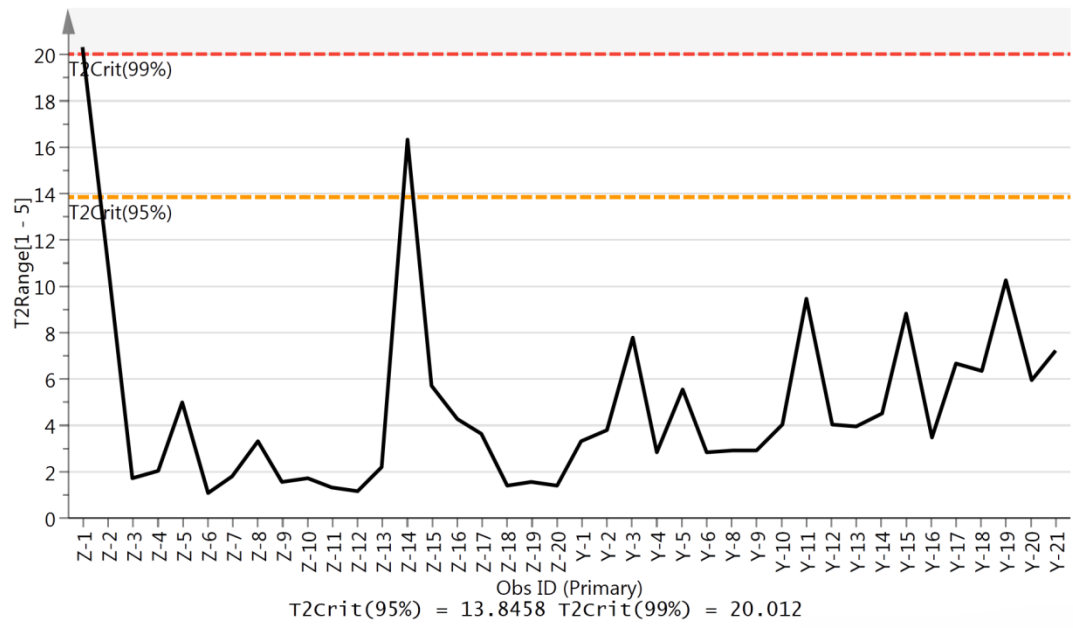

Figure S2 The Hotelling's T2 parameter of the PCA model
